# Supplementary material for: Processes and controls of regional floods over eastern China
Source: Copernicus journal article supplement (doi:10.5194/hess-28-4883-2024), 2024-11-15
Supplement: Supplementary file 1 [file hess-28-4883-2024-supplement.pdf]

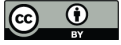

*Supplement of*

## **Processes and controls of regional floods over eastern China**

**Yixin Yang et al.**

*Correspondence to:* Long Yang (yanglong@nju.edu.cn)

The copyright of individual parts of the supplement might differ from the article licence.

14 Table S1. Key hyperparameters of conditional random forest model and out-of-bag (OOB) performance evaluation metrics for eight models.  
 15 Hyperparameter *mtry* is chosen from 2 to 11. Hyperparameter *ntree* is chosen from 50-500 trees with 50 trees as step. Other hyperparameters are  
 16 set as default. The optimal hyperparameter combination are selected to achieve the lowest RMSE. Non-parametric Mann-Whitney U test and  
 17 Kruskal-Wallis test show no significant difference between train error and OOB error, indicating little probability of overfitting. OOB error is the  
 18 prediction error (i.e., prediction minus true value) on each sample using only trees that did not contain this sample in their bootstrap sample.  
 19 Training error is the prediction error on each sample using training set.

| Predictand               | Key hyperparameters |              | Performance metrics (OOB)            |           | P-value of difference test between train and OOB errors |                     |
|--------------------------|---------------------|--------------|--------------------------------------|-----------|---------------------------------------------------------|---------------------|
|                          | <i>mtry</i>         | <i>ntree</i> | RMSE                                 | R-squared | Mann-Whitney test                                       | Kruskal-Wallis test |
| RFI (All)                | 3                   | 100          | 2.36                                 | 0.89      | 0.64                                                    | 0.49                |
| RFI (Mild)               | 4                   | 100          | 1.01                                 | 0.86      | 0.70                                                    | 0.49                |
| RFI (Large)              | 4                   | 350          | 3.64                                 | 0.66      | 0.85                                                    | 0.48                |
| RFI (Intense)            | 5                   | 50           | 2.81                                 | 0.43      | 0.65                                                    | 0.47                |
| Spatial extent (All)     | 8                   | 50           | 5.36x10 <sup>4</sup> km <sup>2</sup> | 0.93      | 0.49                                                    | 0.49                |
| Spatial extent (Mild)    | 11                  | 500          | 3.21x10 <sup>4</sup> km <sup>2</sup> | 0.81      | 0.58                                                    | 0.49                |
| Spatial extent (Large)   | 7                   | 50           | 7.19x10 <sup>4</sup> km <sup>2</sup> | 0.73      | 0.87                                                    | 0.48                |
| Spatial extent (Intense) | 5                   | 50           | 5.36x10 <sup>4</sup> km <sup>2</sup> | 0.53      | 0.74                                                    | 0.47                |

20  
 21  
 22  
 23

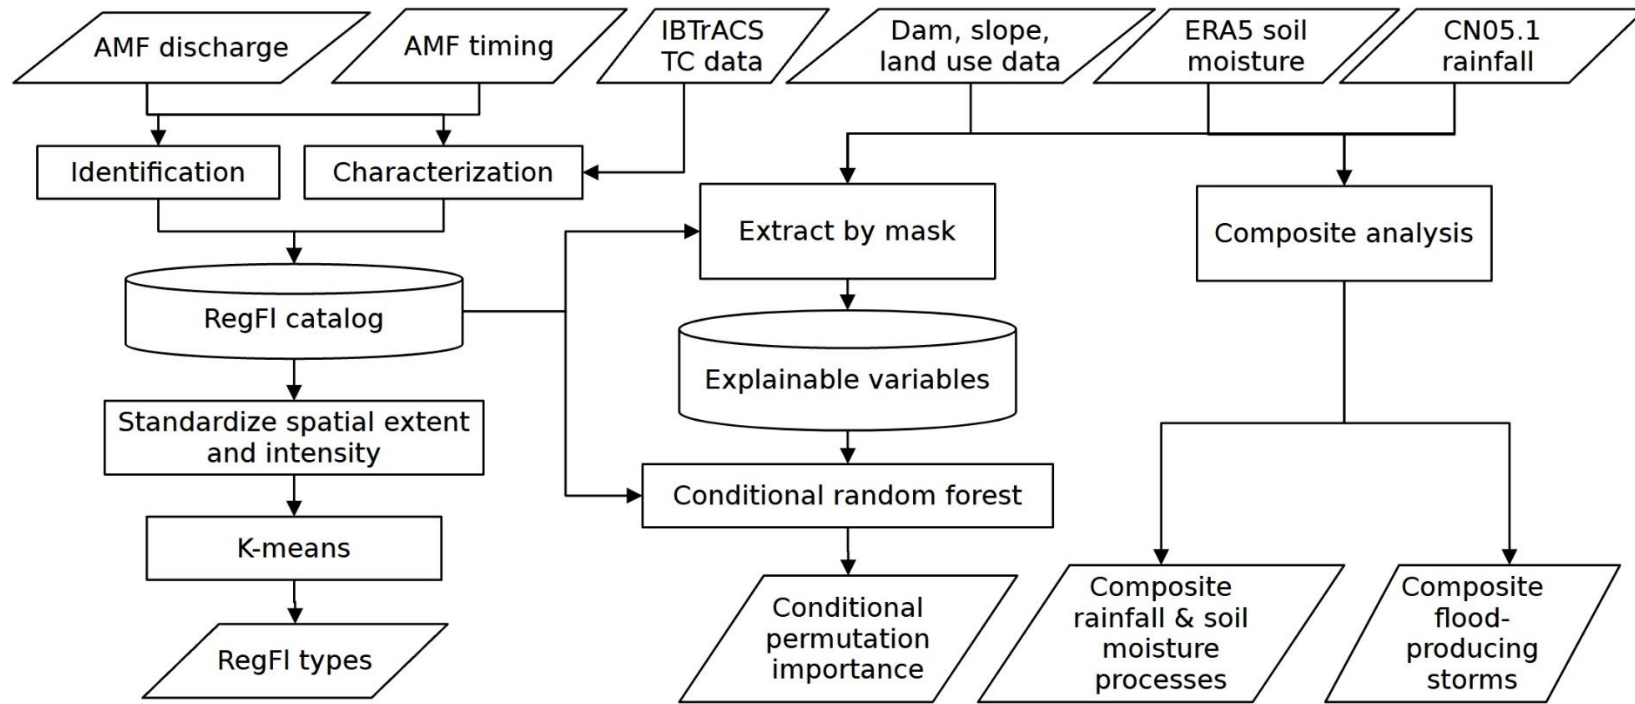

24  
25  
26

Figure S1. Flowchart of regional flood analyses in this study.

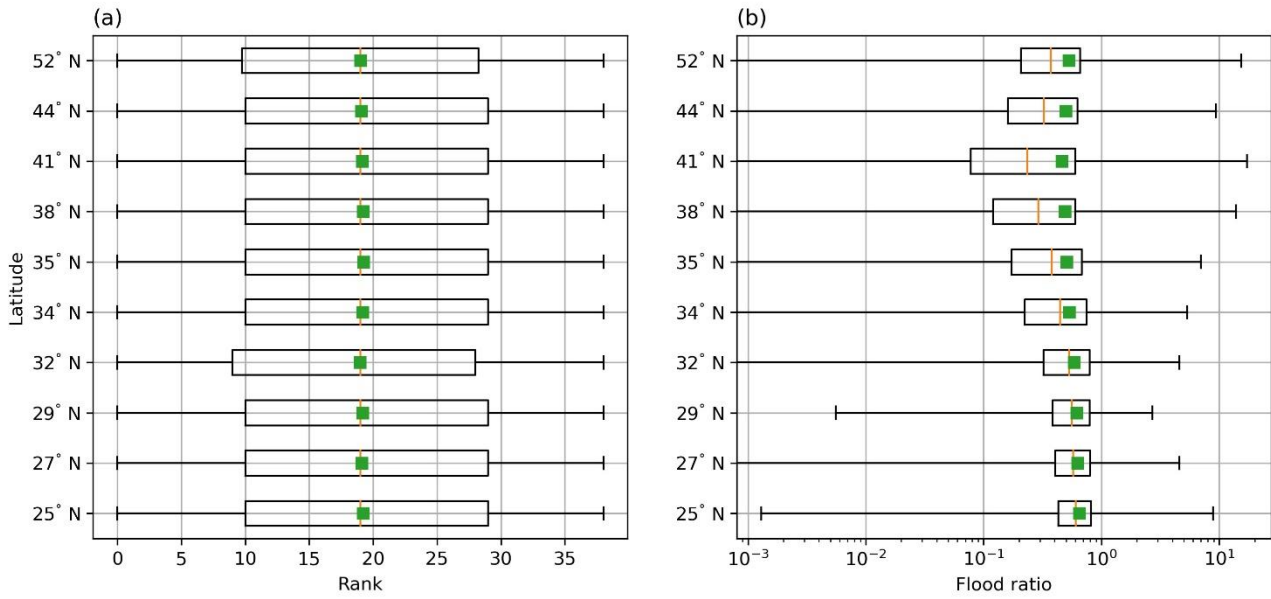

27

28 Figure S2. Decile boxplots for latitude versus (a) rank and (b) flood ratio (ratio of flood peak magnitude  
 29 to the empirical 90th percentile of flood peaks). The orange line and green square within the box  
 30 represent the median and mean values, respectively. The box spans the 25th and 75th percentile, and  
 31 the whiskers represent the minimum and maximum values.

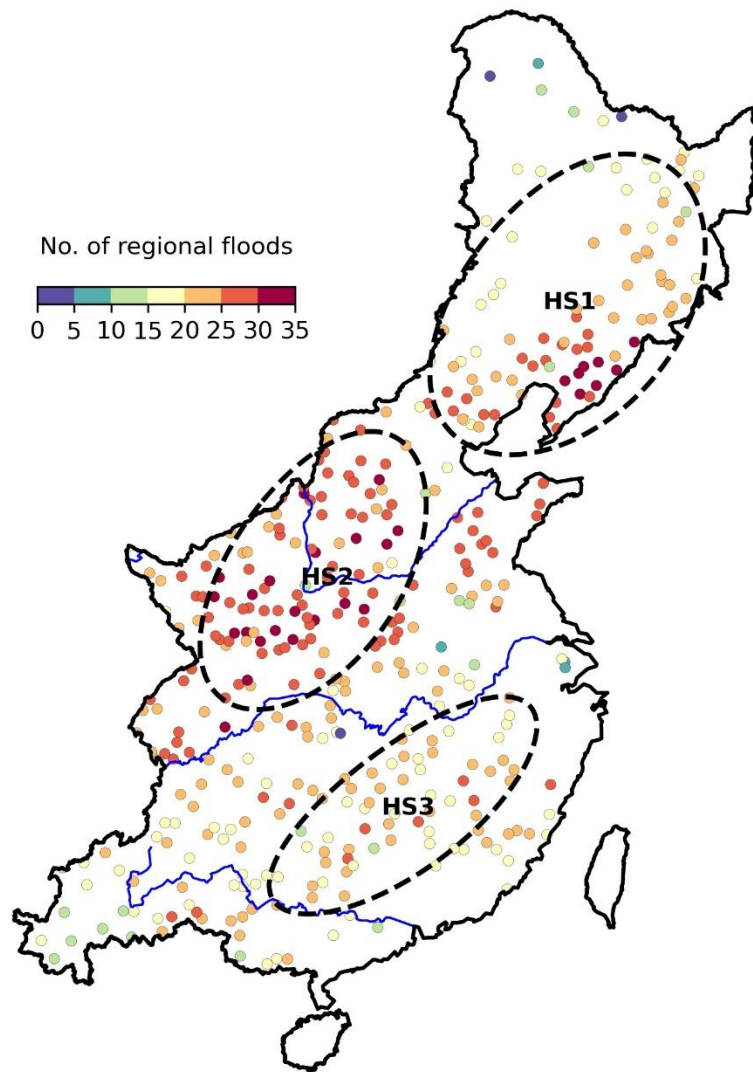

32

33 Figure S3. Spatial distribution of regional flood frequency using spatially uniform stations (i.e., non-  
34 nested basins). The spatial pattern is similar to results obtained from all the stations (Fig. 3a).

35

(a) Seasonality of Isolated Floods (IsoFIs)

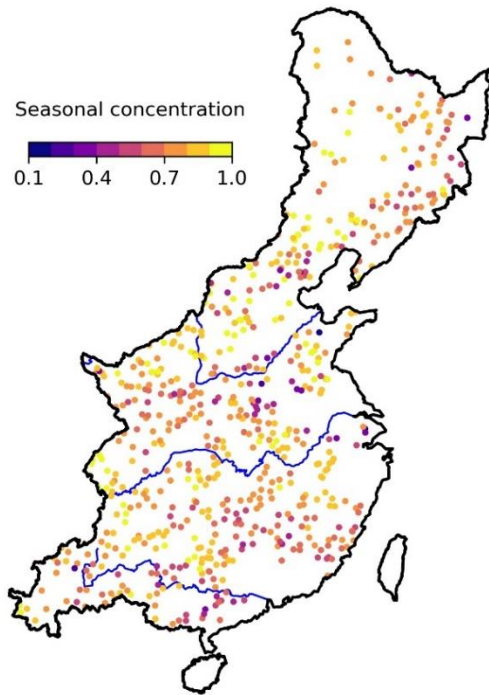

(b) Seasonality of Regional Floods (RegFIs)

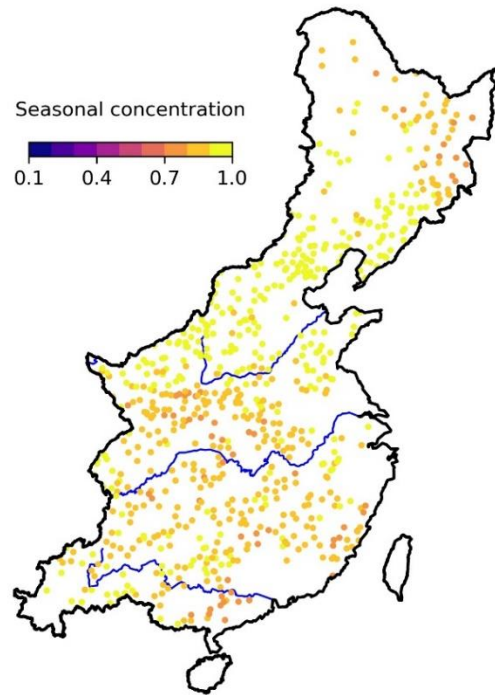

36

37 Figure S4. Seasonal concentration of (a) isolated and (b) regional floods. Higher values indicate more  
38 concentrated timing of AMFs.

39

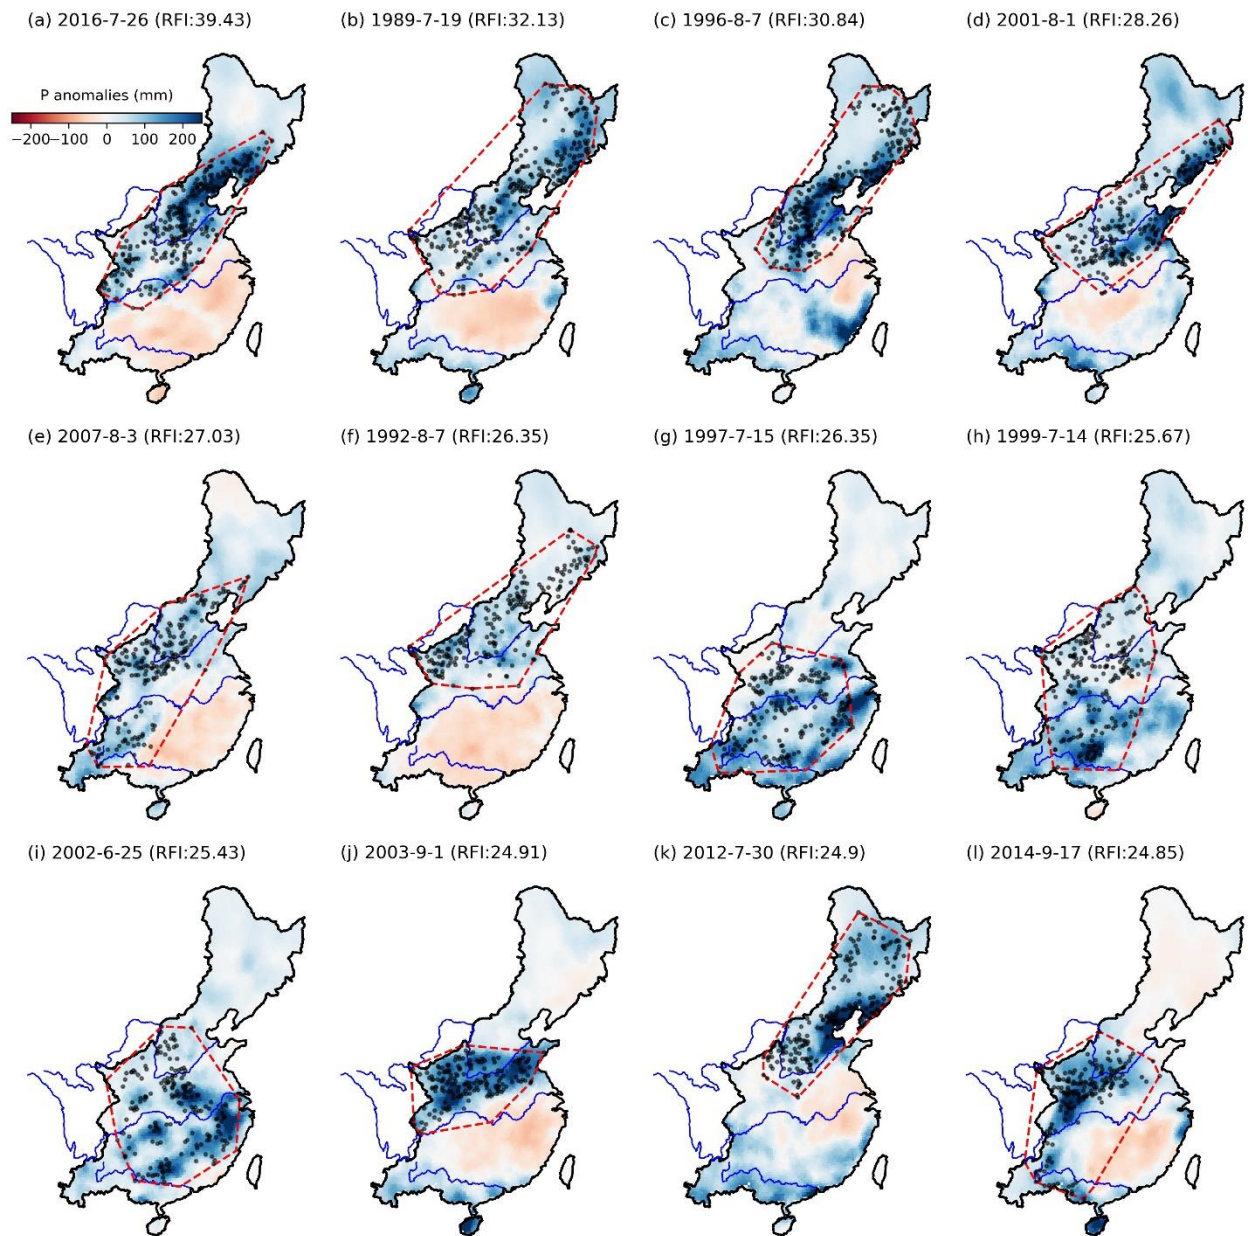

40

41 Figure S5. Precipitation anomalies for the top twelve severest *RegFls*. Black dots represent AMFs with  
 42 drainage area smaller than  $5,000 \text{ km}^2$  in the *RegFl*. Red dashed-line polygons represent convex hull.  
 43

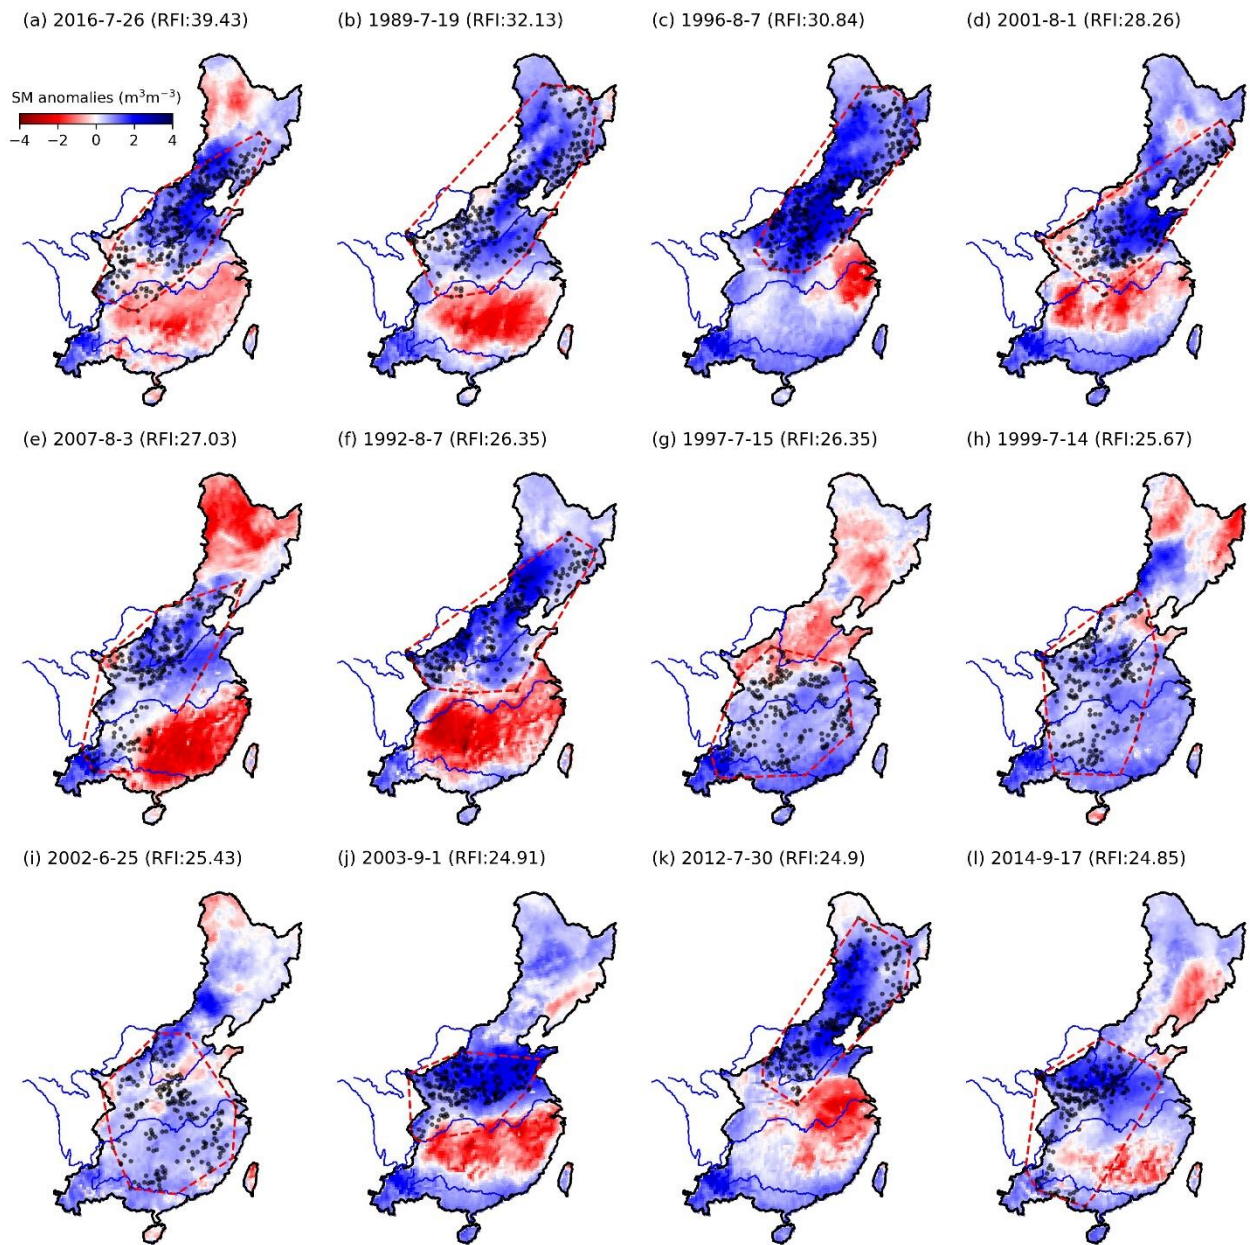

44

45 Figure S6. Soil moisture anomalies for the top twelve severest *RegFls*. Black dots represent AMFs with

46 drainage area smaller than  $5,000 \text{ km}^2$  in the *RegFl*. Red dashed-line polygons represent convex hull.

47



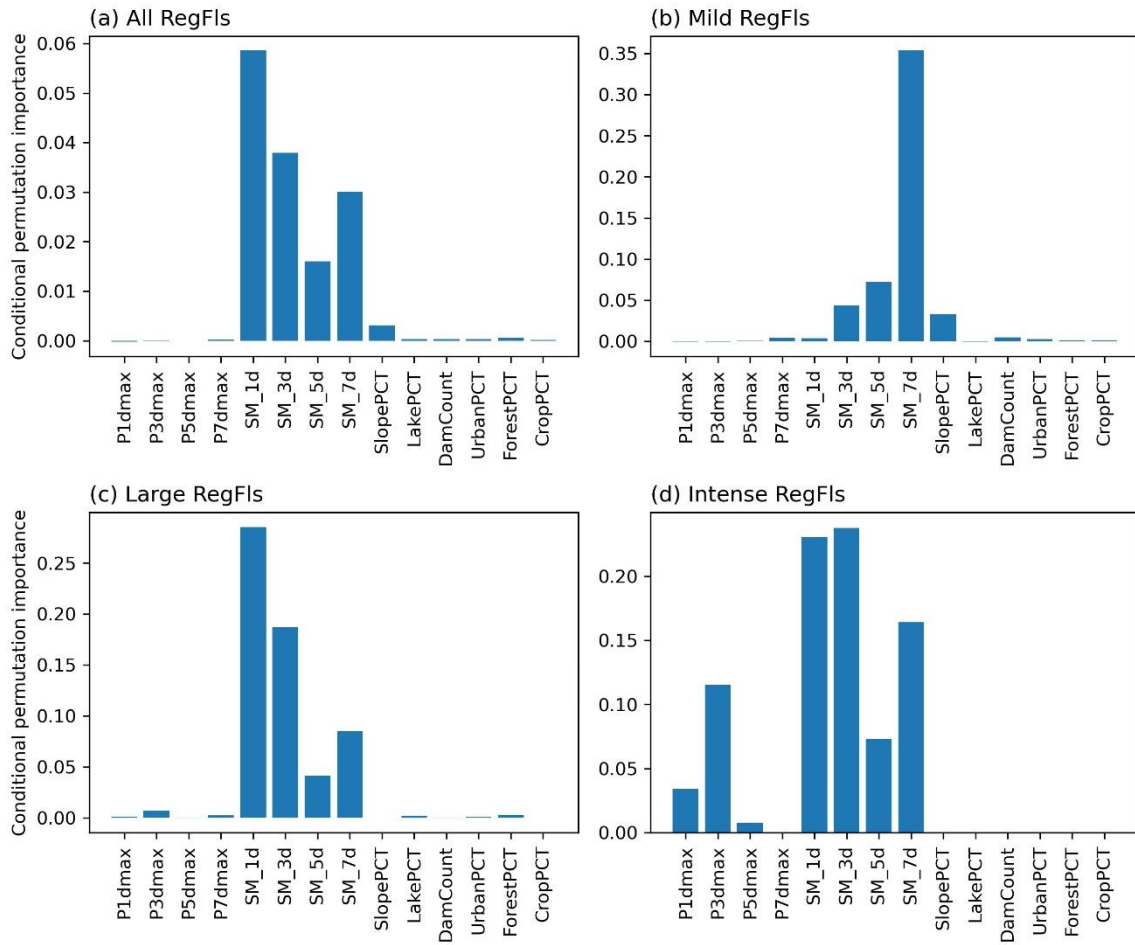

48

49 Figure S7. The conditional permutation importance for potential flood drivers in predicting *RegFls*  
 50 spatial extent for (a) All, (b) Mild, (c) Large and (d) Intense *RegFls*. Refer to Table 1 for details of the  
 51 variables.
